# Supplementary material
Source: Research Square preprint supplement (doi:10.21203/rs.3.rs-9393575/v1)
Supplement: Supplementary file 1 [file 8178b74006999e2d08b76c20.pdf]

# **Association of Traditional and Novel Lipid Indicators With the Hemorrhagic Phenotype in Adult Moyamoya Disease: Implications for Lipid Risk Stratification**

## **Translational Stroke Research**

Weihong Huang<sup>1,2†</sup>, Haoyang Xiong<sup>1,2†</sup>, Wenjing Chen<sup>4</sup>, Wei Liu<sup>3</sup>, Peicong Ge<sup>3</sup>, Yunhao Liu<sup>4</sup>, Xuefeng Tang<sup>4</sup>, Ziheng Yang<sup>4</sup>, Zhongji Yan<sup>4</sup>, Dong Zhang<sup>1,2\*</sup>

**1 Department of Neurosurgery, Beijing Hospital, National Center of Gerontology, Beijing 100730, China**

**2 Institute of Geriatric Medicine, Chinese Academy of Medical Sciences, Beijing, China**

**3 Department of Neurosurgery, Beijing Tiantan Hospital, Capital Medical University, Beijing 100070, China**

**4 School of Clinical Medical Sciences, Southwest Medical University, Luzhou, Sichuan, China**

**Corresponding author: Dong Zhang, Department of Neurosurgery, Beijing Hospital, National Center of Gerontology, Beijing 100730, China. Email:**

**zhangdong0660@aliyun.com**

## **Supplementary Materials**

|                                                                                                                                                              |    |
|--------------------------------------------------------------------------------------------------------------------------------------------------------------|----|
| Supplementary Table 1. Associations of lipid indicators with hemorrhagic presentation after multiple imputation using MICE.....                              | 1  |
| Supplementary Table 2. C statistics between the basic model and selected lipid-augmented models using DeLong's test.....                                     | 5  |
| Supplementary Table 3. Associations of lipid indicators with hemorrhagic presentation using Full Case Analysis.....                                          | 6  |
| Supplementary Table 4. lipid indicators in asymptomatic versus hemorrhagic patients under multi-model logistic regression.....                               | 12 |
| Supplementary Table 5. lipid indicators in ischemic versus hemorrhagic patients under multi-model logistic regression.....                                   | 16 |
| Supplementary Table 6. Subgroup analysis of the role of the lipid parameters with the risk of hemorrhage.....                                                | 20 |
| Supplementary Table 7. Mediation analysis of BMI on the association between non-traditional and traditional lipid parameters and the risk of hemorrhage..... | 25 |
| Supplementary Fig. 1. Pearson correlation analysis and VIF assessment of lipid parameters with covariates in the models.....                                 | 28 |

**Supplementary Table 1. Associations of lipid parameters with the hemorrhagic phenotype after multiple imputation using MICE**

| <b>TG</b>    |                                                  |                                            |                            |                             |                                |                    |  |
|--------------|--------------------------------------------------|--------------------------------------------|----------------------------|-----------------------------|--------------------------------|--------------------|--|
|              | <b>Continuous model<br/>OR (95% CI), P value</b> | <b>Categorical model<br/>Q1 (&lt;0.85)</b> | <b>Q2 (0.85–1.23)</b>      | <b>Q3 (1.23–1.71)</b>       | <b>Q4 (≥1.71)</b>              | <b>P for trend</b> |  |
| Model 1      | 0.888 (0.769, 1.026) 0.106                       | 1                                          | 0.677 (0.473, 0.969) 0.033 | 0.695 (0.487, 0.994) 0.046  | 0.674 (0.471, 0.964)<br>0.031  | 0.040              |  |
| Model 2      | 0.968 (0.841, 1.114) 0.647                       | 1                                          | 0.749 (0.519, 1.083) 0.125 | 0.849 (0.584, 1.234) 0.390  | 0.893 (0.607, 1.314)<br>0.566  | 0.689              |  |
| Model 3      | 0.965 (0.836, 1.115) 0.628                       | 1                                          | 0.785 (0.539, 1.143) 0.207 | 0.885 (0.604, 1.298) 0.533  | 0.907 (0.610, 1.348)<br>0.629  | 0.751              |  |
| <b>TC</b>    |                                                  |                                            |                            |                             |                                |                    |  |
|              | <b>Continuous model<br/>OR (95% CI), P value</b> | <b>Categorical model<br/>Q1 (&lt;3.32)</b> | <b>Q2 (3.32–3.97)</b>      | <b>Q3 (3.97–4.63)</b>       | <b>Q4 (≥4.63)</b>              | <b>P for trend</b> |  |
| Model 1      | 1.562 (1.368, 1.783) <0.001                      | 1                                          | 1.886 (1.231, 2.890) 0.004 | 3.315 (2.203, 4.987) <0.001 | 3.734 (2.488, 5.604)<br><0.001 | <0.001             |  |
| Model 2      | 1.578 (1.378, 1.807) <0.001                      | 1                                          | 1.892 (1.229, 2.914) 0.004 | 3.393 (2.235, 5.151) <0.001 | 3.849 (2.547, 5.817)<br><0.001 | <0.001             |  |
| Model 3      | 1.525 (1.328, 1.751) <0.001                      | 1                                          | 1.820 (1.173, 2.824) 0.008 | 3.147 (2.056, 4.816) <0.001 | 3.435 (2.254, 5.237)<br><0.001 | <0.001             |  |
| <b>LDL-C</b> |                                                  |                                            |                            |                             |                                |                    |  |
|              | <b>Continuous model<br/>OR (95% CI), P value</b> | <b>Categorical model<br/>Q1 (&lt;1.68)</b> | <b>Q2 (1.68–2.24)</b>      | <b>Q3 (2.24–2.82)</b>       | <b>Q4 (≥2.82)</b>              | <b>P for trend</b> |  |
| Model 1      | 1.697 (1.453, 1.981) <0.001                      | 1                                          | 1.457 (0.959, 2.213) 0.078 | 2.552 (1.717, 3.793) <0.001 | 3.388 (2.293, 5.004)<br><0.001 | <0.001             |  |
| Model 2      | 1.744 (1.489, 2.044) <0.001                      | 1                                          | 1.476 (0.968, 2.251) 0.071 | 2.719 (1.816, 4.070) <0.001 | 3.595 (2.418, 5.345)<br><0.001 | <0.001             |  |

|                  |                                                  |                                             |                            |                             |                             |                    |
|------------------|--------------------------------------------------|---------------------------------------------|----------------------------|-----------------------------|-----------------------------|--------------------|
| Model 3          | 1.676 (1.426, 1.969) <0.001                      | 1                                           | 1.416 (0.922, 2.176) 0.112 | 2.482 (1.646, 3.744) <0.001 | 3.197 (2.134, 4.791) <0.001 | <0.001             |
| <b>HDL-C</b>     |                                                  |                                             |                            |                             |                             |                    |
|                  | <b>Continuous model<br/>OR (95% CI), P value</b> | <b>Categorical model<br/>Q1 (&lt;1.00)</b>  | <b>Q2 (1.00–1.18)</b>      | <b>Q3 (1.18–1.38)</b>       | <b>Q4 (≥1.38)</b>           | <b>P for trend</b> |
| Model 1          | 1.933 (1.285, 2.906) 0.002                       | 1                                           | 1.300 (0.892, 1.895) 0.172 | 1.381 (0.954, 2.000) 0.088  | 1.833 (1.269, 2.648) 0.001  | 0.002              |
| Model 2          | 1.517 (0.972, 2.366) 0.066                       | 1                                           | 1.224 (0.834, 1.796) 0.302 | 1.204 (0.817, 1.774) 0.347  | 1.496 (1.001, 2.236) 0.049  | 0.068              |
| Model 3          | 1.344 (0.850, 2.125) 0.206                       | 1                                           | 1.102 (0.744, 1.631) 0.629 | 1.088 (0.731, 1.618) 0.679  | 1.321 (0.874, 1.998) 0.186  | 0.218              |
| <b>AIP</b>       |                                                  |                                             |                            |                             |                             |                    |
|                  | <b>Continuous model<br/>OR (95% CI), P value</b> | <b>Categorical model<br/>Q1 (&lt;-0.18)</b> | <b>Q2 (-0.18–0.01)</b>     | <b>Q3 (0.01–0.21)</b>       | <b>Q4 (≥0.21)</b>           | <b>P for trend</b> |
| Model 1          | 0.559 (0.362, 0.863) 0.009                       | 1                                           | 0.621 (0.436, 0.884) 0.008 | 0.570 (0.396, 0.820) 0.002  | 0.613 (0.429, 0.875) 0.007  | 0.006              |
| Model 2          | 0.808 (0.503, 1.297) 0.377                       | 1                                           | 0.692 (0.481, 0.997) 0.048 | 0.714 (0.484, 1.052) 0.089  | 0.814 (0.549, 1.209) 0.309  | 0.346              |
| Model 3          | 0.867 (0.536, 1.404) 0.562                       | 1                                           | 0.741 (0.510, 1.076) 0.115 | 0.772 (0.520, 1.147) 0.200  | 0.867 (0.579, 1.300) 0.491  | 0.530              |
| <b>Non-HDL-C</b> |                                                  |                                             |                            |                             |                             |                    |
|                  | <b>Continuous model<br/>OR (95% CI), P value</b> | <b>Categorical model<br/>Q1 (&lt;2.14)</b>  | <b>Q2 (2.14–2.74)</b>      | <b>Q3 (2.74–3.38)</b>       | <b>Q4 (≥3.38)</b>           | <b>P for trend</b> |
| Model 1          | 1.518 (1.322, 1.743) <0.001                      | 1                                           | 1.580 (1.041, 2.398) 0.032 | 2.859 (1.924, 4.249) <0.001 | 3.064 (2.066, 4.546) <0.001 | <0.001             |
| Model 2          | 1.584 (1.374, 1.826) <0.001                      | 1                                           | 1.591 (1.043, 2.426) 0.031 | 3.022 (2.018, 4.527) <0.001 | 3.445 (2.301, 5.158) <0.001 | <0.001             |
| Model 3          | 1.537 (1.330, 1.776) <0.001                      | 1                                           | 1.511 (0.983, 2.323) 0.060 | 2.807 (1.860, 4.236) <0.001 | 3.150 (2.087, 4.754) <0.001 | <0.001             |

| <b>AC</b>     |                             |                          |                            |                            |                                |  |                    |
|---------------|-----------------------------|--------------------------|----------------------------|----------------------------|--------------------------------|--|--------------------|
|               | <b>Continuous model</b>     | <b>Categorical model</b> |                            |                            |                                |  | <b>P for trend</b> |
|               | <b>OR (95% CI), P value</b> | <b>Q1 (&lt;1.72)</b>     | <b>Q2 (1.72–2.26)</b>      | <b>Q3 (2.26–3.02)</b>      | <b>Q4 (≥3.02)</b>              |  |                    |
| Model 1       | 1.193 (1.062, 1.341) 0.003  | 1                        | 1.553 (1.064, 2.268) 0.022 | 1.308 (0.890, 1.922) 0.172 | 1.910 (1.317, 2.770)<br><0.001 |  | 0.003              |
| Model 2       | 1.316 (1.160, 1.493) <0.001 | 1                        | 1.706 (1.160, 2.509) 0.007 | 1.625 (1.091, 2.421) 0.017 | 2.560 (1.725, 3.799)<br><0.001 |  | <0.001             |
| Model 3       | 1.310 (1.154, 1.487) <0.001 | 1                        | 1.719 (1.159, 2.549) 0.007 | 1.657 (1.103, 2.489) 0.015 | 2.503 (1.671, 3.750)<br><0.001 |  | <0.001             |
| <b>CRI-I</b>  |                             |                          |                            |                            |                                |  |                    |
|               | <b>Continuous model</b>     | <b>Categorical model</b> |                            |                            |                                |  | <b>P for trend</b> |
|               | <b>OR (95% CI), P value</b> | <b>Q1 (&lt;2.72)</b>     | <b>Q2 (2.72–3.26)</b>      | <b>Q3 (3.26–4.02)</b>      | <b>Q4 (≥4.02)</b>              |  |                    |
| Model 1       | 1.193 (1.062, 1.341) 0.003  | 1                        | 1.553 (1.064, 2.268) 0.022 | 1.308 (0.890, 1.922) 0.172 | 1.910 (1.317, 2.770)<br><0.001 |  | 0.003              |
| Model 2       | 1.316 (1.160, 1.493) <0.001 | 1                        | 1.706 (1.160, 2.509) 0.007 | 1.625 (1.091, 2.421) 0.017 | 2.560 (1.725, 3.799)<br><0.001 |  | <0.001             |
| Model 3       | 1.310 (1.154, 1.487) <0.001 | 1                        | 1.719 (1.159, 2.549) 0.007 | 1.657 (1.103, 2.489) 0.015 | 2.503 (1.671, 3.750)<br><0.001 |  | <0.001             |
| <b>CRI-II</b> |                             |                          |                            |                            |                                |  |                    |
|               | <b>Continuous model</b>     | <b>Categorical model</b> |                            |                            |                                |  | <b>P for trend</b> |
|               | <b>OR (95% CI), P value</b> | <b>Q1 (&lt;1.39)</b>     | <b>Q2 (1.39–1.85)</b>      | <b>Q3 (1.85–2.46)</b>      | <b>Q4 (≥2.46)</b>              |  |                    |
| Model 1       | 1.319 (1.140, 1.525) <0.001 | 1                        | 1.328 (0.906, 1.946) 0.146 | 1.447 (0.991, 2.114) 0.056 | 1.871 (1.292, 2.710)<br><0.001 |  | <0.001             |
| Model 2       | 1.484 (1.267, 1.737) <0.001 | 1                        | 1.420 (0.962, 2.095) 0.077 | 1.689 (1.144, 2.493) 0.008 | 2.398 (1.624, 3.541)<br><0.001 |  | <0.001             |
| Model 3       | 1.457 (1.244, 1.707) <0.001 | 1                        | 1.423 (0.956, 2.119) 0.082 | 1.659 (1.116, 2.466) 0.012 | 2.287 (1.536, 3.406)<br><0.001 |  | <0.001             |
| <b>LCI</b>    |                             |                          |                            |                            |                                |  |                    |
|               | <b>Continuous model</b>     | <b>Categorical model</b> |                            |                            |                                |  | <b>P for trend</b> |
|               | <b>OR (95% CI), P value</b> | <b>Q1 (&lt;4.63)</b>     | <b>Q2 (4.63–8.87)</b>      | <b>Q3 (8.87–17.51)</b>     | <b>Q4 (≥17.51)</b>             |  |                    |
| Model 1       | 1.005 (0.999, 1.012) 0.120  | 1                        | 1.156 (0.796, 1.678) 0.447 | 1.057 (0.725, 1.541) 0.773 | 1.600 (1.114, 2.297)           |  | 0.021              |

|         |                            |   |                            |                            |                                |       |        |
|---------|----------------------------|---|----------------------------|----------------------------|--------------------------------|-------|--------|
| Model 2 | 1.009 (1.002, 1.016) 0.012 | 1 | 1.242 (0.849, 1.816) 0.263 | 1.317 (0.890, 1.947) 0.168 | 2.172 (1.475, 3.199)<br><0.001 | 0.011 | <0.001 |
| Model 3 | 1.009 (1.001, 1.016) 0.019 | 1 | 1.254 (0.851, 1.848) 0.253 | 1.300 (0.871, 1.939) 0.199 | 2.014 (1.355, 2.994)<br><0.001 |       | <0.001 |

| <b>RC</b> |                                                  |                                            |                            |                            |                               |                    |  |
|-----------|--------------------------------------------------|--------------------------------------------|----------------------------|----------------------------|-------------------------------|--------------------|--|
|           | <b>Continuous model<br/>OR (95% CI), P value</b> | <b>Categorical model<br/>Q1 (&lt;0.30)</b> | <b>Q2 (0.30–0.42)</b>      | <b>Q3 (0.42–0.57)</b>      | <b>Q4 (≥0.57)</b>             | <b>P for trend</b> |  |
| Model 1   | 1.046 (0.823, 1.330) 0.712                       | 1                                          | 0.870 (0.603, 1.256) 0.458 | 1.068 (0.745, 1.531) 0.721 | 1.065 (0.744, 1.526)<br>0.729 | 0.506              |  |
| Model 2   | 1.110 (0.869, 1.420) 0.403                       | 1                                          | 0.897 (0.617, 1.305) 0.570 | 1.223 (0.842, 1.776) 0.290 | 1.248 (0.862, 1.807)<br>0.241 | 0.111              |  |
| Model 3   | 1.119 (0.871, 1.436) 0.380                       | 1                                          | 0.909 (0.619, 1.334) 0.624 | 1.237 (0.845, 1.811) 0.275 | 1.279 (0.875, 1.868)<br>0.204 | 0.095              |  |

| <b>RC/HDL-C</b> |                                                  |                                            |                            |                            |                               |                    |  |
|-----------------|--------------------------------------------------|--------------------------------------------|----------------------------|----------------------------|-------------------------------|--------------------|--|
|                 | <b>Continuous model<br/>OR (95% CI), P value</b> | <b>Categorical model<br/>Q1 (&lt;0.24)</b> | <b>Q2 (0.24–0.36)</b>      | <b>Q3 (0.36–0.53)</b>      | <b>Q4 (≥0.53)</b>             | <b>P for trend</b> |  |
| Model 1         | 0.985 (0.761, 1.275) 0.908                       | 1                                          | 0.845 (0.586, 1.217) 0.366 | 1.044 (0.731, 1.491) 0.815 | 0.860 (0.598, 1.238)<br>0.418 | 0.683              |  |
| Model 2         | 1.082 (0.833, 1.406) 0.553                       | 1                                          | 0.930 (0.641, 1.351) 0.705 | 1.296 (0.892, 1.884) 0.174 | 1.104 (0.752, 1.620)<br>0.613 | 0.319              |  |
| Model 3         | 1.113 (0.853, 1.452) 0.429                       | 1                                          | 0.981 (0.670, 1.436) 0.923 | 1.330 (0.909, 1.946) 0.142 | 1.195 (0.808, 1.769)<br>0.373 | 0.190              |  |

Abbreviations: OR, odds ratio; CI, confidence interval; AIP, atherogenic index of plasma; LCI, lipoprotein combined index; CRI-I, Castelli's index-I; CRI-II, Castelli's index-II; RC, remnant cholesterol; RC/HDL-C, remnant cholesterol/high-density lipoprotein cholesterol; AC, atherogenic coefficient; Non-HDL-C, non-high-density lipoprotein cholesterol.

**Supplementary Table 2. Pairwise comparisons of C statistics between the basic model and selected lipid-augmented models using DeLong's test....**

| Model 1                 | Model 2                 | AUC difference (95% CI) | P value |
|-------------------------|-------------------------|-------------------------|---------|
| Basic model             | Basic model + TC        | -0.037 (-0.059--0.015)  | <0.001  |
| Basic model             | Basic model + LDL-C     | -0.041 (-0.064--0.017)  | <0.001  |
| Basic model             | Basic model + Non-HDL-C | -0.037 (-0.059--0.016)  | <0.001  |
| Basic model             | Basic model + CRI-II    | -0.024 (-0.043--0.006)  | 0.010   |
| Basic model + TC        | Basic model + LDL-C     | -0.004 (-0.014-0.006)   | 0.476   |
| Basic model + TC        | Basic model + Non-HDL-C | -0.000 (-0.006-0.005)   | 0.935   |
| Basic model + TC        | Basic model + CRI-II    | 0.013 (-0.003-0.029)    | 0.121   |
| Basic model + LDL-C     | Basic model + Non-HDL-C | 0.003 (-0.007-0.014)    | 0.502   |
| Basic model + LDL-C     | Basic model + CRI-II    | 0.017 (0.004-0.029)     | 0.011   |
| Basic model + Non-HDL-C | Basic model + CRI-II    | 0.013 (0.000-0.026)     | 0.046   |

Note: The basic model included sex, age, BMI, hypertension, diabetes, smoking status, drinking status, bilateral involvement, and dichotomized Suzuki stage ( $\leq 4$  vs  $>4$ ). Missing BMI values were handled using multiple imputation before model fitting. Model discrimination was assessed using the C statistic (AUC), and pairwise differences in AUC were compared using DeLong's test.

**Supplementary Table 3. Associations of lipid parameters with the hemorrhagic phenotype in the complete-case analysis**

| TG               |                   |             |
|------------------|-------------------|-------------|
| Continuous model | Categorical model | P for trend |

|                | OR (95% CI) P value        | Q1 (<0.85) | Q2 (0.85–1.23)             | Q3 (1.23–1.71)                | Q4 (≥1.71)                 |       |
|----------------|----------------------------|------------|----------------------------|-------------------------------|----------------------------|-------|
| <b>Model 1</b> | 0.888 (0.769, 1.026) 0.106 | 1          | 0.677 (0.473, 0.969) 0.033 | 0.695 (0.487, 0.994)<br>0.046 | 0.674 (0.471, 0.964) 0.031 | 0.040 |
| <b>Model 2</b> | 0.978 (0.840, 1.138) 0.771 | 1          | 0.813 (0.548, 1.206) 0.303 | 0.895 (0.595, 1.346)<br>0.595 | 1.033 (0.680, 1.567) 0.880 | 0.819 |
| <b>Model 3</b> | 0.986 (0.845, 1.150) 0.857 | 1          | 0.840 (0.561, 1.258) 0.397 | 0.920 (0.605, 1.398)<br>0.696 | 1.069 (0.696, 1.641) 0.760 | 0.713 |

#### TC

|                | Continuous model               |            | Categorical model          |                                |                             | P for trend |
|----------------|--------------------------------|------------|----------------------------|--------------------------------|-----------------------------|-------------|
|                | OR (95% CI) P value            | Q1 (<3.32) | Q2 (3.32–3.97)             | Q3 (3.97–4.63)                 | Q4 (≥4.63)                  |             |
| <b>Model 1</b> | 1.562 (1.368, 1.783)<br><0.001 | 1          | 1.886 (1.231, 2.890) 0.004 | 3.315 (2.203, 4.987)<br><0.001 | 3.734 (2.488, 5.604) <0.001 | <0.001      |
| <b>Model 2</b> | 1.592 (1.376, 1.841)<br><0.001 | 1          | 2.176 (1.360, 3.480) 0.001 | 3.907 (2.471, 6.177)<br><0.001 | 4.248 (2.698, 6.687) <0.001 | <0.001      |
| <b>Model 3</b> | 1.532 (1.320, 1.778)<br><0.001 | 1          | 2.139 (1.325, 3.453) 0.002 | 3.572 (2.238, 5.701)<br><0.001 | 3.805 (2.393, 6.050) <0.001 | <0.001      |

#### LDL-C

|                | Continuous model     |            | Categorical model          |                      |                             | P for trend |
|----------------|----------------------|------------|----------------------------|----------------------|-----------------------------|-------------|
|                | OR (95% CI) P value  | Q1 (<1.68) | Q2 (1.68–2.24)             | Q3 (2.24–2.82)       | Q4 (≥2.82)                  |             |
| <b>Model 1</b> | 1.697 (1.453, 1.981) | 1          | 1.457 (0.959, 2.213) 0.078 | 2.552 (1.717, 3.793) | 3.388 (2.293, 5.004) <0.001 | <0.001      |

|                |                                |   |                            |                                |                             |        |
|----------------|--------------------------------|---|----------------------------|--------------------------------|-----------------------------|--------|
|                | <0.001                         |   |                            | <0.001                         |                             |        |
| <b>Model 2</b> | 1.871 (1.567, 2.233)<br><0.001 | 1 | 1.772 (1.101, 2.852) 0.019 | 3.508 (2.223, 5.537)<br><0.001 | 4.173 (2.656, 6.557) <0.001 | <0.001 |
| <b>Model 3</b> | 1.789 (1.493, 2.144)<br><0.001 | 1 | 1.706 (1.051, 2.770) 0.031 | 3.144 (1.975, 5.004)<br><0.001 | 3.689 (2.328, 5.846) <0.001 | <0.001 |

#### HDL-C

|                | Continuous model           |            | Categorical model          |                               |                            |       | P for trend |
|----------------|----------------------------|------------|----------------------------|-------------------------------|----------------------------|-------|-------------|
|                | OR (95% CI) P value        | Q1 (<1.00) | Q2 (1.00–1.18)             | Q3 (1.18–1.38)                | Q4 (≥1.38)                 |       |             |
| <b>Model 1</b> | 1.933 (1.285, 2.906) 0.002 | 1          | 1.300 (0.892, 1.895) 0.172 | 1.381 (0.954, 2.000)<br>0.088 | 1.833 (1.269, 2.648) 0.001 | 0.002 |             |
| <b>Model 2</b> | 1.631 (0.992, 2.684) 0.054 | 1          | 1.367 (0.893, 2.094) 0.150 | 1.322 (0.861, 2.028)<br>0.202 | 1.564 (1.007, 2.428) 0.046 | 0.070 |             |
| <b>Model 3</b> | 1.382 (0.825, 2.313) 0.219 | 1          | 1.211 (0.783, 1.875) 0.389 | 1.159 (0.747, 1.800)<br>0.510 | 1.325 (0.842, 2.086) 0.224 | 0.283 |             |

#### AIP

|                | Continuous model           |             | Categorical model          |                               |                            |       | P for trend |
|----------------|----------------------------|-------------|----------------------------|-------------------------------|----------------------------|-------|-------------|
|                | OR (95% CI) P value        | Q1 (<-0.18) | Q2 (-0.18–0.01)            | Q3 (0.01–0.21)                | Q4 (≥0.21)                 |       |             |
| <b>Model 1</b> | 0.559 (0.362, 0.863) 0.009 | 1           | 0.621 (0.436, 0.884) 0.008 | 0.570 (0.396, 0.820)<br>0.002 | 0.613 (0.429, 0.875) 0.007 | 0.006 |             |
| <b>Model 2</b> | 0.898 (0.536, 1.506) 0.684 | 1           | 0.645 (0.436, 0.955) 0.028 | 0.789 (0.518, 1.201)          | 0.830 (0.541, 1.272) 0.392 | 0.554 |             |

|                |                            |   |                            |                            |                            |  |       |
|----------------|----------------------------|---|----------------------------|----------------------------|----------------------------|--|-------|
|                |                            |   |                            |                            | 0.269                      |  |       |
| <b>Model 3</b> | 1.008 (0.594, 1.712) 0.976 | 1 | 0.695 (0.465, 1.038) 0.075 | 0.864 (0.562, 1.327) 0.504 | 0.917 (0.591, 1.422) 0.698 |  | 0.886 |

**Non-HDL-C**

|                | Continuous model               |            | Categorical model          |                                |                             |  | P for trend |
|----------------|--------------------------------|------------|----------------------------|--------------------------------|-----------------------------|--|-------------|
|                | OR (95% CI) P value            | Q1 (<2.14) | Q2 (2.14–2.74)             | Q3 (2.74–3.38)                 | Q4 (≥3.38)                  |  |             |
| <b>Model 1</b> | 1.518 (1.322, 1.743)<br><0.001 | 1          | 1.580 (1.041, 2.398) 0.032 | 2.859 (1.924, 4.249)<br><0.001 | 3.064 (2.066, 4.546) <0.001 |  | <0.001      |
| <b>Model 2</b> | 1.606 (1.377, 1.872)<br><0.001 | 1          | 1.637 (1.044, 2.567) 0.032 | 3.127 (2.028, 4.820)<br><0.001 | 3.621 (2.356, 5.564) <0.001 |  | <0.001      |
| <b>Model 3</b> | 1.556 (1.330, 1.819)<br><0.001 | 1          | 1.567 (0.990, 2.480) 0.055 | 2.884 (1.855, 4.484)<br><0.001 | 3.321 (2.141, 5.149) <0.001 |  | <0.001      |

**AC**

|                | Continuous model               |            | Categorical model          |                               |                             |  | P for trend |
|----------------|--------------------------------|------------|----------------------------|-------------------------------|-----------------------------|--|-------------|
|                | OR (95% CI) P value            | Q1 (<1.72) | Q2 (1.72–2.26)             | Q3 (2.26–3.02)                | Q4 (≥3.02)                  |  |             |
| <b>Model 1</b> | 1.193 (1.062, 1.341) 0.003     | 1          | 1.553 (1.064, 2.268) 0.022 | 1.308 (0.890, 1.922)<br>0.172 | 1.910 (1.317, 2.770) <0.001 |  | 0.003       |
| <b>Model 2</b> | 1.323 (1.153, 1.517)<br><0.001 | 1          | 1.563 (1.038, 2.355) 0.033 | 1.659 (1.086, 2.534)<br>0.019 | 2.622 (1.722, 3.994) <0.001 |  | <0.001      |
| <b>Model 3</b> | 1.323 (1.152, 1.520)           | 1          | 1.567 (1.031, 2.384) 0.036 | 1.690 (1.097, 2.605)          | 2.612 (1.696, 4.024) <0.001 |  | <0.001      |

---

---

<0.001

0.017

---

---

**CRI-I**

|                | Continuous model               |            | Categorical model          |                               |                             |        | P for trend |
|----------------|--------------------------------|------------|----------------------------|-------------------------------|-----------------------------|--------|-------------|
|                | OR (95% CI) P value            | Q1 (<2.72) | Q2 (2.72–3.26)             | Q3 (3.26–4.02)                | Q4 (≥4.02)                  |        |             |
| <b>Model 1</b> | 1.193 (1.062, 1.341) 0.003     | 1          | 1.553 (1.064, 2.268) 0.022 | 1.308 (0.890, 1.922)<br>0.172 | 1.910 (1.317, 2.770) <0.001 | 0.003  |             |
| <b>Model 2</b> | 1.323 (1.153, 1.517)<br><0.001 | 1          | 1.563 (1.038, 2.355) 0.033 | 1.659 (1.086, 2.534)<br>0.019 | 2.622 (1.722, 3.994) <0.001 | <0.001 |             |
| <b>Model 3</b> | 1.323 (1.152, 1.520)<br><0.001 | 1          | 1.567 (1.031, 2.384) 0.036 | 1.690 (1.097, 2.605)<br>0.017 | 2.612 (1.696, 4.024) <0.001 | <0.001 |             |

---

---

**CRI-II**

|                | Continuous model               |            | Categorical model          |                               |                             |        | P for trend |
|----------------|--------------------------------|------------|----------------------------|-------------------------------|-----------------------------|--------|-------------|
|                | OR (95% CI) P value            | Q1 (<1.39) | Q2 (1.39–1.85)             | Q3 (1.85–2.46)                | Q4 (≥2.46)                  |        |             |
| <b>Model 1</b> | 1.319 (1.140, 1.525)<br><0.001 | 1          | 1.328 (0.906, 1.946) 0.146 | 1.447 (0.991, 2.114)<br>0.056 | 1.871 (1.292, 2.710) <0.001 | <0.001 |             |
| <b>Model 2</b> | 1.566 (1.313, 1.867)<br><0.001 | 1          | 1.489 (0.973, 2.280) 0.067 | 1.897 (1.238, 2.907)<br>0.003 | 2.679 (1.746, 4.110) <0.001 | <0.001 |             |
| <b>Model 3</b> | 1.544 (1.293, 1.844)<br><0.001 | 1          | 1.465 (0.946, 2.267) 0.087 | 1.839 (1.190, 2.843)<br>0.006 | 2.569 (1.657, 3.982) <0.001 | <0.001 |             |

---

---

| LCI            |                            |                   |                            |                               |                             |             |
|----------------|----------------------------|-------------------|----------------------------|-------------------------------|-----------------------------|-------------|
|                | Continuous model           | Categorical model |                            |                               |                             | P for trend |
|                | OR (95% CI) P value        | Q1 (<4.63)        | Q2 (4.63–8.87)             | Q3 (8.87–17.51)               | Q4 (≥17.51)                 |             |
| <b>Model 1</b> | 1.005 (0.999, 1.012) 0.120 | 1                 | 1.156 (0.796, 1.678) 0.447 | 1.057 (0.725, 1.541)<br>0.773 | 1.600 (1.114, 2.297) 0.011  | 0.021       |
| <b>Model 2</b> | 1.010 (1.002, 1.017) 0.014 | 1                 | 1.063 (0.700, 1.613) 0.775 | 1.430 (0.946, 2.163)<br>0.090 | 2.406 (1.592, 3.637) <0.001 | <0.001      |
| <b>Model 3</b> | 1.009 (1.002, 1.017) 0.017 | 1                 | 1.062 (0.693, 1.627) 0.783 | 1.387 (0.908, 2.119)<br>0.130 | 2.256 (1.476, 3.447) <0.001 | <0.001      |

| RC             |                            |                   |                            |                               |                            |             |
|----------------|----------------------------|-------------------|----------------------------|-------------------------------|----------------------------|-------------|
|                | Continuous model           | Categorical model |                            |                               |                            | P for trend |
|                | OR (95% CI) P value        | Q1 (<0.3)         | Q2 (0.3–0.42)              | Q3 (0.42–0.57)                | Q4 (≥0.57)                 |             |
| <b>Model 1</b> | 1.046 (0.823, 1.330) 0.712 | 1                 | 0.870 (0.603, 1.256) 0.458 | 1.068 (0.745, 1.531)<br>0.721 | 1.065 (0.744, 1.526) 0.729 | 0.506       |
| <b>Model 2</b> | 1.066 (0.771, 1.474) 0.699 | 1                 | 0.913 (0.612, 1.361) 0.654 | 1.256 (0.842, 1.875)<br>0.264 | 1.353 (0.898, 2.039) 0.148 | 0.069       |
| <b>Model 3</b> | 1.085 (0.781, 1.507) 0.626 | 1                 | 0.937 (0.622, 1.412) 0.756 | 1.291 (0.857, 1.944)<br>0.222 | 1.435 (0.942, 2.185) 0.093 | 0.043       |

| RC/HDL-C |                  |                   |  |  |  |             |
|----------|------------------|-------------------|--|--|--|-------------|
|          | Continuous model | Categorical model |  |  |  | P for trend |

|                | OR (95% CI) P value        | Q1 (<0.24) | Q2 (0.24–0.36)             | Q3 (0.36–0.53)                | Q4 (≥0.53)                 |       |
|----------------|----------------------------|------------|----------------------------|-------------------------------|----------------------------|-------|
| <b>Model 1</b> | 0.985 (0.761, 1.275) 0.908 | 1          | 0.845 (0.586, 1.217) 0.366 | 1.044 (0.731, 1.491)<br>0.815 | 0.860 (0.598, 1.238) 0.418 | 0.683 |
| <b>Model 2</b> | 0.991 (0.698, 1.408) 0.960 | 1          | 0.974 (0.655, 1.449) 0.896 | 1.453 (0.977, 2.162)<br>0.065 | 1.084 (0.704, 1.669) 0.715 | 0.306 |
| <b>Model 3</b> | 1.046 (0.736, 1.488) 0.801 | 1          | 1.027 (0.684, 1.540) 0.899 | 1.524 (1.016, 2.286)<br>0.042 | 1.222 (0.785, 1.902) 0.375 | 0.133 |

Note: Model 1 was unadjusted. Model 2 was adjusted for sex, age, and BMI. Model 3 was further adjusted for hypertension, diabetes, smoking, drinking, bilateral involvement, and dichotomized Suzuki stage ( $\leq 4$  vs  $> 4$ ). For categorical models, quartile 1 was used as the reference category. P for trend was calculated by entering quartile categories (1-4) as an ordinal variable. Variables analyzed: TG, TC, LDL-C, HDL-C, AIP, Non-HDL-C, AC, CRI-I, CRI-II, LCI, RC, and RC/HDL-C.

#### Supplementary Table 4. Associations of lipid parameters in asymptomatic versus hemorrhagic patients under multivariable logistic regression

| TG             |                            |                   |                            |                            |                            |             |  |  |
|----------------|----------------------------|-------------------|----------------------------|----------------------------|----------------------------|-------------|--|--|
|                | Continuous model           | Categorical model |                            |                            |                            | P for trend |  |  |
|                | OR (95% CI), P value       | Q1 (<0.85)        | Q2 (0.85–1.23)             | Q3 (1.23–1.71)             | Q4 (≥1.71)                 |             |  |  |
| <b>Model 1</b> | 0.833 (0.686, 1.012) 0.065 | 1                 | 0.662 (0.353, 1.241) 0.198 | 0.765 (0.403, 1.452) 0.413 | 0.559 (0.304, 1.028) 0.061 | 0.098       |  |  |
| <b>Model 2</b> | 0.858 (0.701, 1.050) 0.136 | 1                 | 0.684 (0.359, 1.307) 0.250 | 0.807 (0.413, 1.577) 0.531 | 0.603 (0.311, 1.171) 0.136 | 0.205       |  |  |
| <b>Model 3</b> | 0.853 (0.694, 1.048) 0.131 | 1                 | 0.640 (0.329, 1.245) 0.189 | 0.787 (0.396, 1.565) 0.495 | 0.607 (0.307, 1.203) 0.153 | 0.234       |  |  |

TC

|                | Continuous model           |            | Categorical model          |                             |                             |        | P for trend |
|----------------|----------------------------|------------|----------------------------|-----------------------------|-----------------------------|--------|-------------|
|                | OR (95% CI), P value       | Q1 (<3.32) | Q2 (3.32–3.97)             | Q3 (3.97–4.63)              | Q4 (≥4.63)                  |        |             |
| <b>Model 1</b> | 1.297 (1.038, 1.621) 0.022 | 1          | 1.843 (0.963, 3.525) 0.065 | 3.890 (1.971, 7.675) <0.001 | 2.573 (1.388, 4.769) 0.003  | 0.001  |             |
| <b>Model 2</b> | 1.352 (1.078, 1.696) 0.009 | 1          | 1.999 (1.023, 3.906) 0.043 | 4.452 (2.207, 8.978) <0.001 | 2.948 (1.559, 5.576) <0.001 | <0.001 |             |
| <b>Model 3</b> | 1.290 (1.024, 1.626) 0.031 | 1          | 1.824 (0.914, 3.640) 0.088 | 4.088 (1.982, 8.430) <0.001 | 2.697 (1.391, 5.227) 0.003  | 0.001  |             |

#### LDL-C

|                | Continuous model           |            | Categorical model          |                             |                            |       | P for trend |
|----------------|----------------------------|------------|----------------------------|-----------------------------|----------------------------|-------|-------------|
|                | OR (95% CI), P value       | Q1 (<1.68) | Q2 (1.68–2.24)             | Q3 (2.24–2.82)              | Q4 (≥2.82)                 |       |             |
| <b>Model 1</b> | 1.415 (1.087, 1.842) 0.010 | 1          | 1.547 (0.810, 2.954) 0.186 | 3.369 (1.705, 6.656) <0.001 | 2.205 (1.210, 4.017) 0.010 | 0.004 |             |
| <b>Model 2</b> | 1.470 (1.124, 1.921) 0.005 | 1          | 1.526 (0.789, 2.952) 0.209 | 3.513 (1.759, 7.019) <0.001 | 2.410 (1.305, 4.453) 0.005 | 0.002 |             |
| <b>Model 3</b> | 1.432 (1.089, 1.882) 0.010 | 1          | 1.474 (0.749, 2.903) 0.262 | 3.254 (1.595, 6.635) 0.001  | 2.280 (1.204, 4.318) 0.011 | 0.004 |             |

#### HDL-C

|                | Continuous model           |            | Categorical model          |                            |                            |       | P for trend |
|----------------|----------------------------|------------|----------------------------|----------------------------|----------------------------|-------|-------------|
|                | OR (95% CI), P value       | Q1 (<1.00) | Q2 (1.00–1.18)             | Q3 (1.18–1.38)             | Q4 (≥1.38)                 |       |             |
| <b>Model 1</b> | 2.092 (0.995, 4.395) 0.051 | 1          | 1.654 (0.895, 3.058) 0.108 | 1.734 (0.946, 3.179) 0.075 | 2.112 (1.145, 3.898) 0.017 | 0.019 |             |
| <b>Model 2</b> | 2.511 (1.084, 5.820) 0.032 | 1          | 1.862 (0.988, 3.510) 0.055 | 1.970 (1.029, 3.772) 0.041 | 2.569 (1.296, 5.091) 0.007 | 0.009 |             |
| <b>Model 3</b> | 1.954 (0.829, 4.609) 0.126 | 1          | 1.450 (0.746, 2.819) 0.273 | 1.716 (0.870, 3.385) 0.119 | 2.103 (1.032, 4.285) 0.041 | 0.039 |             |

#### AIP

|                | Continuous model           |             | Categorical model          |                            |                            |       | P for trend |
|----------------|----------------------------|-------------|----------------------------|----------------------------|----------------------------|-------|-------------|
|                | OR (95% CI), P value       | Q1 (<-0.18) | Q2 (-0.18–0.01)            | Q3 (0.01–0.21)             | Q4 (≥0.21)                 |       |             |
| <b>Model 1</b> | 0.426 (0.203, 0.896) 0.024 | 1           | 0.553 (0.292, 1.048) 0.069 | 0.525 (0.274, 1.009) 0.053 | 0.465 (0.249, 0.871) 0.017 | 0.020 |             |

|                |                            |   |                            |                            |                            |       |
|----------------|----------------------------|---|----------------------------|----------------------------|----------------------------|-------|
| <b>Model 2</b> | 0.415 (0.181, 0.952) 0.038 | 1 | 0.529 (0.274, 1.023) 0.058 | 0.516 (0.256, 1.036) 0.063 | 0.441 (0.221, 0.881) 0.020 | 0.030 |
| <b>Model 3</b> | 0.464 (0.197, 1.093) 0.079 | 1 | 0.545 (0.276, 1.077) 0.081 | 0.497 (0.243, 1.015) 0.055 | 0.479 (0.234, 0.977) 0.043 | 0.051 |

**Non-HDL-C**

|                | <b>Continuous model</b>     |   | <b>Categorical model</b>   |                             |                            | <b>P for trend</b> |
|----------------|-----------------------------|---|----------------------------|-----------------------------|----------------------------|--------------------|
|                | <b>OR (95% CI), P value</b> |   | <b>Q1 (&lt;2.14)</b>       | <b>Q2 (2.14–2.74)</b>       | <b>Q3 (2.74–3.38)</b>      |                    |
| <b>Model 1</b> | 1.240 (0.983, 1.565) 0.069  | 1 | 2.087 (1.078, 4.040) 0.029 | 3.513 (1.818, 6.787) <0.001 | 2.235 (1.230, 4.059) 0.008 | 0.007              |
| <b>Model 2</b> | 1.298 (1.025, 1.642) 0.030  | 1 | 2.168 (1.105, 4.253) 0.024 | 3.879 (1.977, 7.612) <0.001 | 2.589 (1.399, 4.792) 0.002 | 0.002              |
| <b>Model 3</b> | 1.254 (0.987, 1.595) 0.064  | 1 | 1.959 (0.980, 3.915) 0.057 | 3.624 (1.804, 7.278) <0.001 | 2.387 (1.260, 4.522) 0.008 | 0.005              |

**AC**

|                | <b>Continuous model</b>     |   | <b>Categorical model</b>   |                            |                            | <b>P for trend</b> |
|----------------|-----------------------------|---|----------------------------|----------------------------|----------------------------|--------------------|
|                | <b>OR (95% CI), P value</b> |   | <b>Q1 (&lt;1.72)</b>       | <b>Q2 (1.72–2.26)</b>      | <b>Q3 (2.26–3.02)</b>      |                    |
| <b>Model 1</b> | 1.058 (0.867, 1.292) 0.578  | 1 | 1.510 (0.792, 2.877) 0.211 | 1.102 (0.588, 2.066) 0.761 | 1.492 (0.801, 2.779) 0.208 | 0.389              |
| <b>Model 2</b> | 1.093 (0.881, 1.354) 0.419  | 1 | 1.706 (0.880, 3.309) 0.114 | 1.253 (0.649, 2.419) 0.502 | 1.757 (0.906, 3.408) 0.096 | 0.213              |
| <b>Model 3</b> | 1.105 (0.886, 1.379) 0.375  | 1 | 1.790 (0.903, 3.548) 0.095 | 1.224 (0.618, 2.427) 0.562 | 1.867 (0.938, 3.716) 0.075 | 0.194              |

**CRI-I**

|                | <b>Continuous model</b>     |   | <b>Categorical model</b>   |                            |                            | <b>P for trend</b> |
|----------------|-----------------------------|---|----------------------------|----------------------------|----------------------------|--------------------|
|                | <b>OR (95% CI), P value</b> |   | <b>Q1 (&lt;2.72)</b>       | <b>Q2 (2.72–3.26)</b>      | <b>Q3 (3.26–4.02)</b>      |                    |
| <b>Model 1</b> | 1.058 (0.867, 1.292) 0.578  | 1 | 1.510 (0.792, 2.877) 0.211 | 1.102 (0.588, 2.066) 0.761 | 1.492 (0.801, 2.779) 0.208 | 0.389              |
| <b>Model 2</b> | 1.093 (0.881, 1.354) 0.419  | 1 | 1.706 (0.880, 3.309) 0.114 | 1.253 (0.649, 2.419) 0.502 | 1.757 (0.906, 3.408) 0.096 | 0.213              |
| <b>Model 3</b> | 1.105 (0.886, 1.379) 0.375  | 1 | 1.790 (0.903, 3.548) 0.095 | 1.224 (0.618, 2.427) 0.562 | 1.867 (0.938, 3.716) 0.075 | 0.194              |

---

**CRI-II**

|                | Continuous model           | Categorical model |                            |                            |                            | P for trend |
|----------------|----------------------------|-------------------|----------------------------|----------------------------|----------------------------|-------------|
|                | OR (95% CI), P value       | Q1 (<1.39)        | Q2 (1.39–1.85)             | Q3 (1.85–2.46)             | Q4 (≥2.46)                 |             |
| <b>Model 1</b> | 1.144 (0.888, 1.473) 0.299 | 1                 | 1.035 (0.553, 1.938) 0.915 | 1.323 (0.694, 2.521) 0.396 | 1.464 (0.779, 2.748) 0.236 | 0.164       |
| <b>Model 2</b> | 1.186 (0.905, 1.556) 0.217 | 1                 | 1.024 (0.539, 1.945) 0.942 | 1.450 (0.746, 2.818) 0.273 | 1.641 (0.846, 3.183) 0.143 | 0.082       |
| <b>Model 3</b> | 1.213 (0.918, 1.603) 0.175 | 1                 | 1.034 (0.532, 2.008) 0.922 | 1.380 (0.693, 2.750) 0.360 | 1.769 (0.886, 3.531) 0.106 | 0.067       |

---

**LCI**

|                | Continuous model           | Categorical model |                            |                            |                            | P for trend |
|----------------|----------------------------|-------------------|----------------------------|----------------------------|----------------------------|-------------|
|                | OR (95% CI), P value       | Q1 (<4.63)        | Q2 (4.63–8.87)             | Q3 (8.87–17.51)            | Q4 (≥17.51)                |             |
| <b>Model 1</b> | 0.997 (0.987, 1.007) 0.538 | 1                 | 1.266 (0.656, 2.444) 0.482 | 0.869 (0.466, 1.622) 0.659 | 1.167 (0.632, 2.154) 0.622 | 0.897       |
| <b>Model 2</b> | 0.999 (0.988, 1.009) 0.799 | 1                 | 1.323 (0.678, 2.580) 0.411 | 1.012 (0.529, 1.937) 0.972 | 1.355 (0.708, 2.590) 0.359 | 0.518       |
| <b>Model 3</b> | 0.998 (0.988, 1.009) 0.762 | 1                 | 1.299 (0.655, 2.578) 0.454 | 0.989 (0.506, 1.932) 0.974 | 1.270 (0.651, 2.475) 0.483 | 0.663       |

---

**RC**

|                | Continuous model           | Categorical model |                            |                            |                            | P for trend |
|----------------|----------------------------|-------------------|----------------------------|----------------------------|----------------------------|-------------|
|                | OR (95% CI), P value       | Q1 (<0.3)         | Q2 (0.3–0.42)              | Q3 (0.42–0.57)             | Q4 (≥0.57)                 |             |
| <b>Model 1</b> | 0.875 (0.614, 1.247) 0.459 | 1                 | 0.848 (0.461, 1.557) 0.595 | 1.120 (0.602, 2.082) 0.720 | 1.134 (0.610, 2.107) 0.692 | 0.520       |
| <b>Model 2</b> | 0.928 (0.646, 1.334) 0.687 | 1                 | 0.842 (0.452, 1.568) 0.588 | 1.272 (0.670, 2.417) 0.462 | 1.237 (0.650, 2.355) 0.517 | 0.318       |
| <b>Model 3</b> | 0.888 (0.611, 1.289) 0.531 | 1                 | 0.833 (0.437, 1.587) 0.579 | 1.378 (0.710, 2.676) 0.343 | 1.154 (0.595, 2.238) 0.672 | 0.401       |

---

**RC/HDL-C**

|                | Continuous model           | Categorical model |                            |                            |                            | P for trend |
|----------------|----------------------------|-------------------|----------------------------|----------------------------|----------------------------|-------------|
|                | OR (95% CI), P value       | Q1 (<0.24)        | Q2 (0.24–0.36)             | Q3 (0.36–0.53)             | Q4 (≥0.53)                 |             |
| <b>Model 1</b> | 0.888 (0.604, 1.306) 0.545 | 1                 | 0.759 (0.409, 1.411) 0.384 | 1.024 (0.545, 1.924) 0.942 | 0.797 (0.428, 1.486) 0.476 | 0.707       |
| <b>Model 2</b> | 0.926 (0.623, 1.377) 0.705 | 1                 | 0.856 (0.454, 1.614) 0.632 | 1.132 (0.579, 2.212) 0.717 | 0.895 (0.462, 1.736) 0.743 | 0.931       |
| <b>Model 3</b> | 0.915 (0.607, 1.378) 0.670 | 1                 | 0.880 (0.459, 1.686) 0.699 | 1.099 (0.553, 2.183) 0.788 | 0.969 (0.488, 1.921) 0.927 | 0.932       |

Note: Model 1 was unadjusted. Model 2 was adjusted for sex, age, and BMI. Model 3 was further adjusted for hypertension, diabetes, smoking, drinking, bilateral involvement, and dichotomized Suzuki stage ( $\leq 4$  vs  $>4$ ). For categorical models, quartile 1 was used as the reference category. P for trend was calculated by entering quartile categories (1-4) as an ordinal variable.

### Supplementary Table 5. Associations of lipid parameters in ischemic versus hemorrhagic patients under multivariable logistic regression

| TG             |                            |                   |                            |                            |                            |             |
|----------------|----------------------------|-------------------|----------------------------|----------------------------|----------------------------|-------------|
|                | Continuous model           | Categorical model |                            |                            |                            | P for trend |
|                | OR (95% CI), P value       | Q1 (<0.85)        | Q2 (0.85–1.23)             | Q3 (1.23–1.71)             | Q4 (≥1.71)                 |             |
| <b>Model 1</b> | 0.898 (0.773, 1.043) 0.158 | 1                 | 0.679 (0.471, 0.979) 0.038 | 0.687 (0.478, 0.988) 0.043 | 0.693 (0.481, 1.000) 0.050 | 0.057       |
| <b>Model 2</b> | 0.986 (0.904, 1.077) 0.761 | 1                 | 0.772 (0.529, 1.125) 0.178 | 0.856 (0.584, 1.254) 0.425 | 0.955 (0.642, 1.419) 0.819 | 0.907       |
| <b>Model 3</b> | 0.983 (0.879, 1.100) 0.769 | 1                 | 0.813 (0.552, 1.196) 0.293 | 0.899 (0.607, 1.329) 0.592 | 0.968 (0.644, 1.455) 0.877 | 0.964       |

  

| TC             |                             |                   |                            |                             |                             |             |
|----------------|-----------------------------|-------------------|----------------------------|-----------------------------|-----------------------------|-------------|
|                | Continuous model            | Categorical model |                            |                             |                             | P for trend |
|                | OR (95% CI), P value        | Q1 (<3.32)        | Q2 (3.32–3.97)             | Q3 (3.97–4.63)              | Q4 (≥4.63)                  |             |
| <b>Model 1</b> | 1.675 (1.454, 1.929) <0.001 | 1                 | 1.892 (1.229, 2.913) 0.004 | 3.251 (2.150, 4.916) <0.001 | 3.970 (2.625, 6.005) <0.001 | <0.001      |

|                |                             |   |                            |                             |                             |        |
|----------------|-----------------------------|---|----------------------------|-----------------------------|-----------------------------|--------|
| <b>Model 2</b> | 1.702 (1.471, 1.969) <0.001 | 1 | 1.888 (1.218, 2.925) 0.004 | 3.299 (2.160, 5.040) <0.001 | 4.129 (2.706, 6.299) <0.001 | <0.001 |
| <b>Model 3</b> | 1.638 (1.412, 1.901) <0.001 | 1 | 1.829 (1.170, 2.859) 0.008 | 3.077 (1.996, 4.744) <0.001 | 3.670 (2.383, 5.654) <0.001 | <0.001 |

**LDL-C**

|                | Continuous model            | Q1 (<1.68) | Categorical model          |                             |                             | P for trend |
|----------------|-----------------------------|------------|----------------------------|-----------------------------|-----------------------------|-------------|
|                | OR (95% CI), P value        |            | Q2 (1.68–2.24)             | Q3 (2.24–2.82)              | Q4 (≥2.82)                  |             |
| <b>Model 1</b> | 1.773 (1.507, 2.085) <0.001 | 1          | 1.446 (0.947, 2.207) 0.088 | 2.470 (1.654, 3.690) <0.001 | 3.655 (2.452, 5.447) <0.001 | <0.001      |
| <b>Model 2</b> | 1.841 (1.558, 2.176) <0.001 | 1          | 1.468 (0.956, 2.254) 0.079 | 2.667 (1.770, 4.018) <0.001 | 3.967 (2.639, 5.964) <0.001 | <0.001      |
| <b>Model 3</b> | 1.765 (1.489, 2.092) <0.001 | 1          | 1.429 (0.923, 2.212) 0.110 | 2.459 (1.619, 3.737) <0.001 | 3.549 (2.341, 5.380) <0.001 | <0.001      |

**HDL-C**

|                | Continuous model           | Q1 (<1.00) | Categorical model          |                            |                            | P for trend |
|----------------|----------------------------|------------|----------------------------|----------------------------|----------------------------|-------------|
|                | OR (95% CI), P value       |            | Q2 (1.00–1.18)             | Q3 (1.18–1.38)             | Q4 (≥1.38)                 |             |
| <b>Model 1</b> | 1.930 (1.270, 2.931) 0.002 | 1          | 1.255 (0.856, 1.841) 0.245 | 1.335 (0.916, 1.946) 0.133 | 1.793 (1.232, 2.610) 0.002 | 0.003       |
| <b>Model 2</b> | 1.473 (0.936, 2.318) 0.094 | 1          | 1.162 (0.785, 1.719) 0.453 | 1.148 (0.775, 1.700) 0.492 | 1.411 (0.937, 2.125) 0.099 | 0.125       |
| <b>Model 3</b> | 1.273 (0.797, 2.035) 0.312 | 1          | 1.041 (0.695, 1.557) 0.847 | 1.022 (0.682, 1.532) 0.915 | 1.216 (0.796, 1.857) 0.366 | 0.402       |

**AIP**

|                | Continuous model           | Q1 (<-0.18) | Categorical model          |                            |                            | P for trend |
|----------------|----------------------------|-------------|----------------------------|----------------------------|----------------------------|-------------|
|                | OR (95% CI), P value       |             | Q2 (-0.18–0.01)            | Q3 (0.01–0.21)             | Q4 (≥0.21)                 |             |
| <b>Model 1</b> | 0.580 (0.373, 0.902) 0.016 | 1           | 0.630 (0.440, 0.904) 0.012 | 0.576 (0.398, 0.834) 0.004 | 0.637 (0.443, 0.918) 0.015 | 0.012       |
| <b>Model 2</b> | 0.880 (0.544, 1.424) 0.603 | 1           | 0.723 (0.498, 1.049) 0.088 | 0.741 (0.499, 1.102) 0.139 | 0.886 (0.592, 1.327) 0.558 | 0.577       |
| <b>Model 3</b> | 0.948 (0.580, 1.549) 0.831 | 1           | 0.775 (0.529, 1.135) 0.190 | 0.817 (0.545, 1.224) 0.327 | 0.949 (0.627, 1.436) 0.805 | 0.838       |

| <b>Non-HDL-C</b> |                             |                          |                            |                             |                             |                    |
|------------------|-----------------------------|--------------------------|----------------------------|-----------------------------|-----------------------------|--------------------|
|                  | <b>Continuous model</b>     | <b>Categorical model</b> |                            |                             |                             | <b>P for trend</b> |
|                  | <b>OR (95% CI), P value</b> | <b>Q1 (&lt;2.14)</b>     | <b>Q2 (2.14–2.74)</b>      | <b>Q3 (2.74–3.38)</b>       | <b>Q4 (≥3.38)</b>           |                    |
| <b>Model 1</b>   | 1.637 (1.411, 1.898) <0.001 | 1                        | 1.526 (1.001, 2.327) 0.050 | 2.783 (1.862, 4.159) <0.001 | 3.241 (2.167, 4.848) <0.001 | <0.001             |
| <b>Model 2</b>   | 1.729 (1.481, 2.019) <0.001 | 1                        | 1.535 (1.000, 2.356) 0.050 | 2.965 (1.963, 4.479) <0.001 | 3.736 (2.466, 5.661) <0.001 | <0.001             |
| <b>Model 3</b>   | 1.676 (1.432, 1.961) <0.001 | 1                        | 1.473 (0.951, 2.280) 0.082 | 2.784 (1.828, 4.241) <0.001 | 3.443 (2.252, 5.264) <0.001 | <0.001             |

| <b>AC</b>      |                             |                          |                            |                            |                             |                    |
|----------------|-----------------------------|--------------------------|----------------------------|----------------------------|-----------------------------|--------------------|
|                | <b>Continuous model</b>     | <b>Categorical model</b> |                            |                            |                             | <b>P for trend</b> |
|                | <b>OR (95% CI), P value</b> | <b>Q1 (&lt;1.72)</b>     | <b>Q2 (1.72–2.26)</b>      | <b>Q3 (2.26–3.02)</b>      | <b>Q4 (≥3.02)</b>           |                    |
| <b>Model 1</b> | 1.222 (1.081, 1.381) 0.001  | 1                        | 1.559 (1.062, 2.289) 0.023 | 1.340 (0.906, 1.981) 0.143 | 1.980 (1.355, 2.892) <0.001 | 0.002              |
| <b>Model 2</b> | 1.369 (1.196, 1.567) <0.001 | 1                        | 1.752 (1.181, 2.598) 0.005 | 1.678 (1.116, 2.522) 0.013 | 2.767 (1.840, 4.161) <0.001 | <0.001             |
| <b>Model 3</b> | 1.367 (1.194, 1.566) <0.001 | 1                        | 1.784 (1.191, 2.670) 0.005 | 1.757 (1.159, 2.666) 0.008 | 2.756 (1.812, 4.193) <0.001 | <0.001             |

| <b>CRI-I</b>   |                             |                          |                            |                            |                             |                    |
|----------------|-----------------------------|--------------------------|----------------------------|----------------------------|-----------------------------|--------------------|
|                | <b>Continuous model</b>     | <b>Categorical model</b> |                            |                            |                             | <b>P for trend</b> |
|                | <b>OR (95% CI), P value</b> | <b>Q1 (&lt;2.72)</b>     | <b>Q2 (2.72–3.26)</b>      | <b>Q3 (3.26–4.02)</b>      | <b>Q4 (≥4.02)</b>           |                    |
| <b>Model 1</b> | 1.222 (1.081, 1.381) 0.001  | 1                        | 1.559 (1.062, 2.289) 0.023 | 1.340 (0.906, 1.981) 0.143 | 1.980 (1.355, 2.892) <0.001 | 0.002              |
| <b>Model 2</b> | 1.369 (1.196, 1.567) <0.001 | 1                        | 1.752 (1.181, 2.598) 0.005 | 1.678 (1.116, 2.522) 0.013 | 2.767 (1.840, 4.161) <0.001 | <0.001             |
| <b>Model 3</b> | 1.367 (1.194, 1.566) <0.001 | 1                        | 1.784 (1.191, 2.670) 0.005 | 1.757 (1.159, 2.666) 0.008 | 2.756 (1.812, 4.193) <0.001 | <0.001             |

| <b>CRI-II</b> |                         |                          |  |  |  |                    |
|---------------|-------------------------|--------------------------|--|--|--|--------------------|
|               | <b>Continuous model</b> | <b>Categorical model</b> |  |  |  | <b>P for trend</b> |

|                | OR (95% CI), P value        | Q1 (<1.39) | Q2 (1.39–1.85)             | Q3 (1.85–2.46)             | Q4 (≥2.46)                  |        |
|----------------|-----------------------------|------------|----------------------------|----------------------------|-----------------------------|--------|
| <b>Model 1</b> | 1.355 (1.164, 1.577) <0.001 | 1          | 1.375 (0.932, 2.028) 0.108 | 1.464 (0.997, 2.151) 0.052 | 1.936 (1.327, 2.824) <0.001 | <0.001 |
| <b>Model 2</b> | 1.561 (1.322, 1.843) <0.001 | 1          | 1.483 (0.996, 2.207) 0.052 | 1.727 (1.161, 2.568) 0.007 | 2.552 (1.713, 3.802) <0.001 | <0.001 |
| <b>Model 3</b> | 1.533 (1.297, 1.813) <0.001 | 1          | 1.500 (0.998, 2.255) 0.051 | 1.726 (1.152, 2.587) 0.008 | 2.461 (1.635, 3.704) <0.001 | <0.001 |

### LCI

|                | Continuous model           | Categorical model |                            |                            |                             | P for trend |
|----------------|----------------------------|-------------------|----------------------------|----------------------------|-----------------------------|-------------|
|                | OR (95% CI), P value       | Q1 (<4.63)        | Q2 (4.63–8.87)             | Q3 (8.87–17.51)            | Q4 (≥17.51)                 |             |
| <b>Model 1</b> | 1.008 (1.000, 1.016) 0.038 | 1                 | 1.143 (0.783, 1.669) 0.489 | 1.087 (0.741, 1.594) 0.671 | 1.678 (1.160, 2.429) 0.006  | 0.010       |
| <b>Model 2</b> | 1.013 (1.005, 1.021) 0.001 | 1                 | 1.223 (0.830, 1.801) 0.308 | 1.384 (0.927, 2.067) 0.112 | 2.382 (1.600, 3.545) <0.001 | <0.001      |
| <b>Model 3</b> | 1.013 (1.004, 1.021) 0.003 | 1                 | 1.247 (0.839, 1.853) 0.274 | 1.388 (0.920, 2.093) 0.118 | 2.227 (1.481, 3.350) <0.001 | <0.001      |

### RC

|                | Continuous model           | Categorical model |                            |                            |                            | P for trend |
|----------------|----------------------------|-------------------|----------------------------|----------------------------|----------------------------|-------------|
|                | OR (95% CI), P value       | Q1 (<0.3)         | Q2 (0.3–0.42)              | Q3 (0.42–0.57)             | Q4 (≥0.57)                 |             |
| <b>Model 1</b> | 1.097 (0.836, 1.440) 0.505 | 1                 | 0.873 (0.601, 1.270) 0.479 | 1.061 (0.735, 1.532) 0.753 | 1.056 (0.732, 1.523) 0.770 | 0.555       |
| <b>Model 2</b> | 1.165 (0.877, 1.548) 0.292 | 1                 | 0.902 (0.614, 1.323) 0.596 | 1.227 (0.837, 1.800) 0.294 | 1.250 (0.854, 1.830) 0.251 | 0.120       |
| <b>Model 3</b> | 1.187 (0.887, 1.588) 0.248 | 1                 | 0.910 (0.615, 1.349) 0.640 | 1.230 (0.831, 1.821) 0.300 | 1.293 (0.874, 1.912) 0.198 | 0.098       |

### RC/HDL-C

|                | Continuous model           | Categorical model |                            |                            |                            | P for trend |
|----------------|----------------------------|-------------------|----------------------------|----------------------------|----------------------------|-------------|
|                | OR (95% CI), P value       | Q1 (<0.24)        | Q2 (0.24–0.36)             | Q3 (0.36–0.53)             | Q4 (≥0.53)                 |             |
| <b>Model 1</b> | 1.004 (0.764, 1.319) 0.980 | 1                 | 0.858 (0.591, 1.245) 0.419 | 1.046 (0.727, 1.505) 0.807 | 0.869 (0.600, 1.260) 0.460 | 0.713       |

|                |                            |   |                            |                            |                            |       |
|----------------|----------------------------|---|----------------------------|----------------------------|----------------------------|-------|
| <b>Model 2</b> | 1.102 (0.833, 1.457) 0.498 | 1 | 0.939 (0.641, 1.375) 0.747 | 1.333 (0.908, 1.959) 0.142 | 1.140 (0.770, 1.689) 0.512 | 0.252 |
| <b>Model 3</b> | 1.149 (0.863, 1.530) 0.342 | 1 | 0.983 (0.665, 1.452) 0.930 | 1.369 (0.925, 2.027) 0.116 | 1.239 (0.828, 1.854) 0.297 | 0.141 |

Note: Model 1 was unadjusted. Model 2 was adjusted for sex, age, and BMI. Model 3 was further adjusted for hypertension, diabetes, smoking, drinking, bilateral involvement, and dichotomized Suzuki stage ( $\leq 4$  vs  $>4$ ). For categorical models, quartile 1 was used as the reference category. P for trend was calculated by entering quartile categories (1-4) as an ordinal variable.

### Supplementary Table 6. Subgroup analyses of associations between key lipid parameters and the risk of hemorrhage

| Subgroups           | Event/Total | OR (95% CI)         | P value | P for interaction |
|---------------------|-------------|---------------------|---------|-------------------|
| <b>TC</b>           |             |                     |         |                   |
| <b>Age</b>          |             |                     |         |                   |
| <42 y               | 151/560     | 1.504 (1.217-1.860) | <0.001  |                   |
| $\geq 42$ y         | 168/616     | 1.557 (1.290-1.880) | <0.001  | 0.726             |
| <b>Sex</b>          |             |                     |         |                   |
| Female              | 188/654     | 1.584 (1.312-1.913) | <0.001  |                   |
| Male                | 131/522     | 1.525 (1.235-1.881) | <0.001  | 0.884             |
| <b>Hypertension</b> |             |                     |         |                   |
| No                  | 232/728     | 1.669 (1.392-2.003) | <0.001  |                   |
| Yes                 | 87/448      | 1.417 (1.138-1.765) | 0.002   | 0.129             |
| <b>BMI</b>          |             |                     |         |                   |

|                     |         |                     |        |       |
|---------------------|---------|---------------------|--------|-------|
| <28                 | 270/902 | 1.543 (1.320-1.804) | <0.001 |       |
| ≥28                 | 49/274  | 1.425 (1.021-1.990) | 0.037  | 0.577 |
| <b>LDL-C</b>        |         |                     |        |       |
| <b>Age</b>          |         |                     |        |       |
| <42 y               | 151/560 | 1.703 (1.338-2.168) | <0.001 |       |
| ≥42 y               | 168/616 | 1.702 (1.362-2.128) | <0.001 | 0.973 |
| <b>Sex</b>          |         |                     |        |       |
| Female              | 188/654 | 1.820 (1.459-2.270) | <0.001 |       |
| Male                | 131/522 | 1.618 (1.264-2.071) | <0.001 | 0.525 |
| <b>Hypertension</b> |         |                     |        |       |
| No                  | 232/728 | 1.790 (1.461-2.192) | <0.001 |       |
| Yes                 | 87/448  | 1.606 (1.207-2.136) | 0.001  | 0.482 |
| <b>BMI</b>          |         |                     |        |       |
| <28                 | 270/902 | 1.620 (1.352-1.942) | <0.001 |       |
| ≥28                 | 49/274  | 1.892 (1.164-3.076) | 0.010  | 0.603 |
| <b>Non-HDL-C</b>    |         |                     |        |       |
| <b>Age</b>          |         |                     |        |       |
| <42 y               | 151/560 | 1.468 (1.181-1.824) | <0.001 |       |
| ≥42 y               | 168/616 | 1.630 (1.331-1.997) | <0.001 | 0.439 |
| <b>Sex</b>          |         |                     |        |       |
| Female              | 188/654 | 1.601 (1.312-1.953) | <0.001 |       |
| Male                | 131/522 | 1.549 (1.246-1.926) | <0.001 | 0.974 |
| <b>Hypertension</b> |         |                     |        |       |
| No                  | 232/728 | 1.650 (1.364-1.996) | <0.001 |       |
| Yes                 | 87/448  | 1.472 (1.171-1.850) | <0.001 | 0.351 |
| <b>BMI</b>          |         |                     |        |       |
| <28                 | 270/902 | 1.537 (1.304-1.811) | <0.001 |       |
| ≥28                 | 49/274  | 1.440 (1.016-2.041) | 0.040  | 0.730 |

| AC                  |         |  |                     |              |
|---------------------|---------|--|---------------------|--------------|
| <b>Age</b>          |         |  |                     |              |
| <42 y               | 151/560 |  | 1.215 (1.013-1.457) | 0.036        |
| ≥42 y               | 168/616 |  | 1.491 (1.230-1.808) | <0.001 0.129 |
| <b>Sex</b>          |         |  |                     |              |
| Female              | 188/654 |  | 1.337 (1.110-1.611) | 0.002        |
| Male                | 131/522 |  | 1.331 (1.113-1.593) | 0.002 0.689  |
| <b>Hypertension</b> |         |  |                     |              |
| No                  | 232/728 |  | 1.259 (1.066-1.487) | 0.007        |
| Yes                 | 87/448  |  | 1.440 (1.158-1.790) | 0.001 0.268  |
| <b>BMI</b>          |         |  |                     |              |
| <28                 | 270/902 |  | 1.284 (1.110-1.485) | <0.001       |
| ≥28                 | 49/274  |  | 1.268 (0.931-1.728) | 0.132 0.926  |
| CRI-I               |         |  |                     |              |
| <b>Age</b>          |         |  |                     |              |
| <42 y               | 151/560 |  | 1.215 (1.013-1.457) | 0.036        |
| ≥42 y               | 168/616 |  | 1.491 (1.230-1.808) | <0.001 0.129 |
| <b>Sex</b>          |         |  |                     |              |
| Female              | 188/654 |  | 1.337 (1.110-1.611) | 0.002        |
| Male                | 131/522 |  | 1.331 (1.113-1.593) | 0.002 0.689  |
| <b>Hypertension</b> |         |  |                     |              |
| No                  | 232/728 |  | 1.259 (1.066-1.487) | 0.007        |
| Yes                 | 87/448  |  | 1.440 (1.158-1.790) | 0.001 0.268  |
| <b>BMI</b>          |         |  |                     |              |
| <28                 | 270/902 |  | 1.284 (1.110-1.485) | <0.001       |
| ≥28                 | 49/274  |  | 1.268 (0.931-1.728) | 0.132 0.926  |
| CRI-II              |         |  |                     |              |
| <b>Age</b>          |         |  |                     |              |

|                     |         |                     |        |       |
|---------------------|---------|---------------------|--------|-------|
| <42 y               | 151/560 | 1.398 (1.125-1.737) | 0.002  |       |
| ≥42 y               | 168/616 | 1.640 (1.289-2.086) | <0.001 | 0.346 |
| <b>Sex</b>          |         |                     |        |       |
| Female              | 188/654 | 1.575 (1.242-1.998) | <0.001 |       |
| Male                | 131/522 | 1.427 (1.147-1.775) | 0.001  | 0.771 |
| <b>Hypertension</b> |         |                     |        |       |
| No                  | 232/728 | 1.446 (1.182-1.770) | <0.001 |       |
| Yes                 | 87/448  | 1.541 (1.165-2.037) | 0.002  | 0.526 |
| <b>BMI</b>          |         |                     |        |       |
| <28                 | 270/902 | 1.409 (1.175-1.690) | <0.001 |       |
| ≥28                 | 49/274  | 1.448 (0.963-2.178) | 0.075  | 0.785 |
| <b>LCI</b>          |         |                     |        |       |
| <b>Age</b>          |         |                     |        |       |
| <42 y               | 151/560 | 1.008 (0.997-1.020) | 0.166  |       |
| ≥42 y               | 168/616 | 1.010 (1.000-1.020) | 0.052  | 0.792 |
| <b>Sex</b>          |         |                     |        |       |
| Female              | 188/654 | 1.009 (0.999-1.019) | 0.076  |       |
| Male                | 131/522 | 1.010 (1.000-1.021) | 0.060  | 0.587 |
| <b>Hypertension</b> |         |                     |        |       |
| No                  | 232/728 | 1.009 (0.999-1.020) | 0.088  |       |
| Yes                 | 87/448  | 1.009 (0.999-1.020) | 0.077  | 0.922 |
| <b>BMI</b>          |         |                     |        |       |
| <28                 | 270/902 | 1.009 (1.000-1.019) | 0.049  |       |
| ≥28                 | 49/274  | 1.006 (0.992-1.019) | 0.427  | 0.752 |

Note: Models were adjusted for sex, age, BMI, hypertension, diabetes, smoking status, drinking status, bilateral involvement, and dichotomized Suzuki stage ( $\leq 4$  vs  $>4$ ).

**Supplementary Table 7. Mediation analysis of BMI in the associations between traditional and nontraditional lipid parameters and the risk of hemorrhage**

| Lipid traits | Direct effect |         | Indirect effect |         | Total effect |         | Mediation proportion |                | P value |
|--------------|---------------|---------|-----------------|---------|--------------|---------|----------------------|----------------|---------|
|              | $\beta$       | P value | $\beta$         | P value | $\beta$      | P value | $\beta$              | 95%CI          |         |
| TG           | -0.0289       | 0.688   | -0.0004         | 0.775   | -0.0913      | 0.218   | 0.41%                | -2.9%–3.7%     | 0.806   |
| TC           | 0.4256        | <0.001  | -0.0140         | 0.229   | 0.4079       | <0.001  | -3.42%               | -9.1%–2.3%     | 0.239   |
| LDL-C        | 0.5249        | <0.001  | -0.0328         | 0.061   | 0.4889       | <0.001  | -6.71%               | -14.1%–0.7%    | 0.074   |
| HDL-C        | 0.2758        | 0.239   | 0.1921          | 0.002   | 0.4662       | 0.039   | 41.20%               | -6.1%–88.5%    | 0.088   |
| AIP          | -0.1066       | 0.664   | -0.2778         | 0.001   | -0.3889      | 0.097   | 71.43%               | -23.8%–166.7%  | 0.142   |
| Non-HDL-C    | 0.4353        | <0.001  | -0.0370         | 0.014   | 0.3932       | <0.001  | -9.40%               | -17.7%–1.1%    | 0.026   |
| AC           | 0.2758        | <0.001  | -0.0644         | <0.001  | 0.2092       | <0.001  | -30.77%              | -55.8%–5.7%    | 0.016   |
| CRI-I        | 0.2758        | <0.001  | -0.0644         | <0.001  | 0.2092       | <0.001  | -30.77%              | -55.8%–5.7%    | 0.016   |
| CRI-II       | 0.3882        | <0.001  | -0.0799         | 0.001   | 0.3056       | <0.001  | -26.14%              | -46.8%–5.5%    | 0.013   |
| LCI          | 0.0091        | 0.015   | -0.0030         | 0.002   | 0.0061       | 0.093   | -48.40%              | -113.3%–16.5%  | 0.144   |
| RC           | 0.1092        | 0.392   | -0.0370         | 0.157   | 0.0671       | 0.594   | -55.10%              | -286.1%–175.9% | 0.640   |
| RC/HDL-C     | 0.1053        | 0.437   | -0.0523         | 0.062   | 0.0464       | 0.730   | -112.90%             | -788.0%–562.2% | 0.743   |

Notes:

1. Missing BMI values were handled using MICE with 20 imputations.
2. Mediator model: linear regression for BMI; outcome model: logistic regression for hemorrhagic phenotype.
3. Models adjusted for age, sex, hypertension, diabetes, smoking, alcohol consumption, laterality, and Suzuki stage.
4.  $\beta$  for direct, indirect, and total effects are reported on the logit scale. A negative mediation proportion indicates suppression.

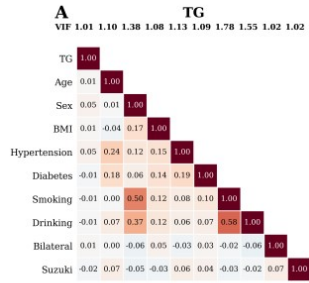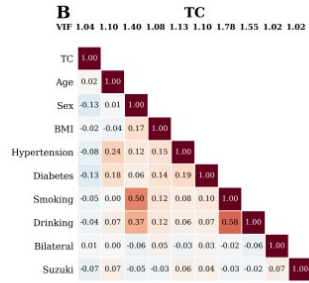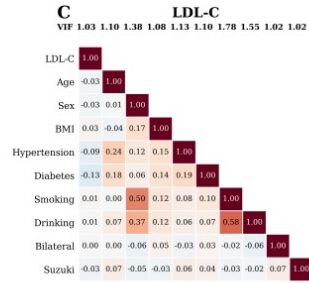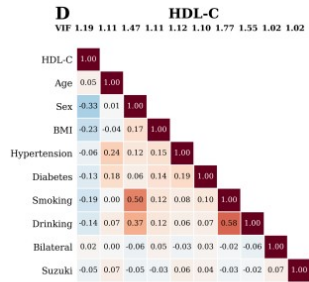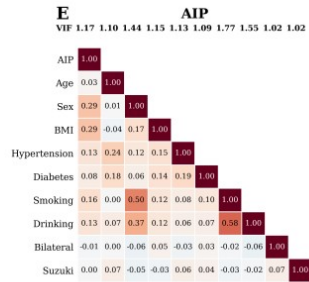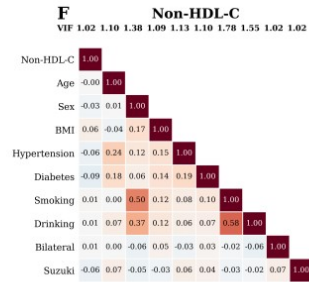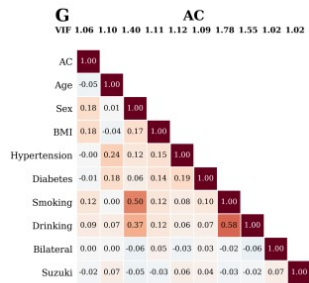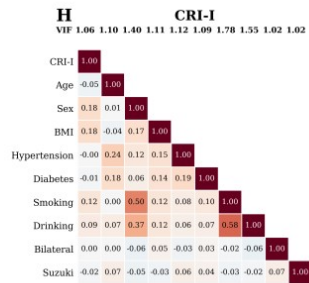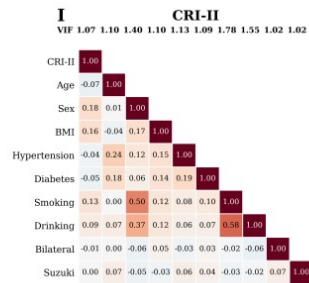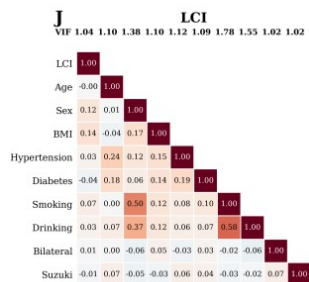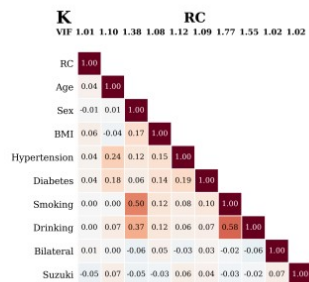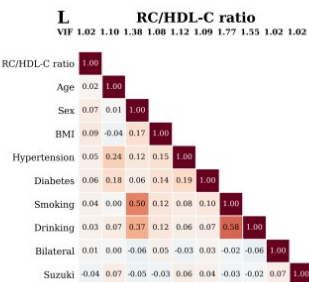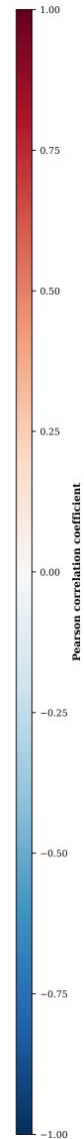

**Supplementary Fig. 1. Pearson correlation matrix and variance inflation factor (VIF) assessment of lipid parameters and model covariates**
